# Supplementary material
Source: PubMed Central journal article supplement (PMC9269030)
Supplement: NIHMS1763146-supplement-fS1.pdf [file NIHMS1763146-supplement-fS1.pdf]

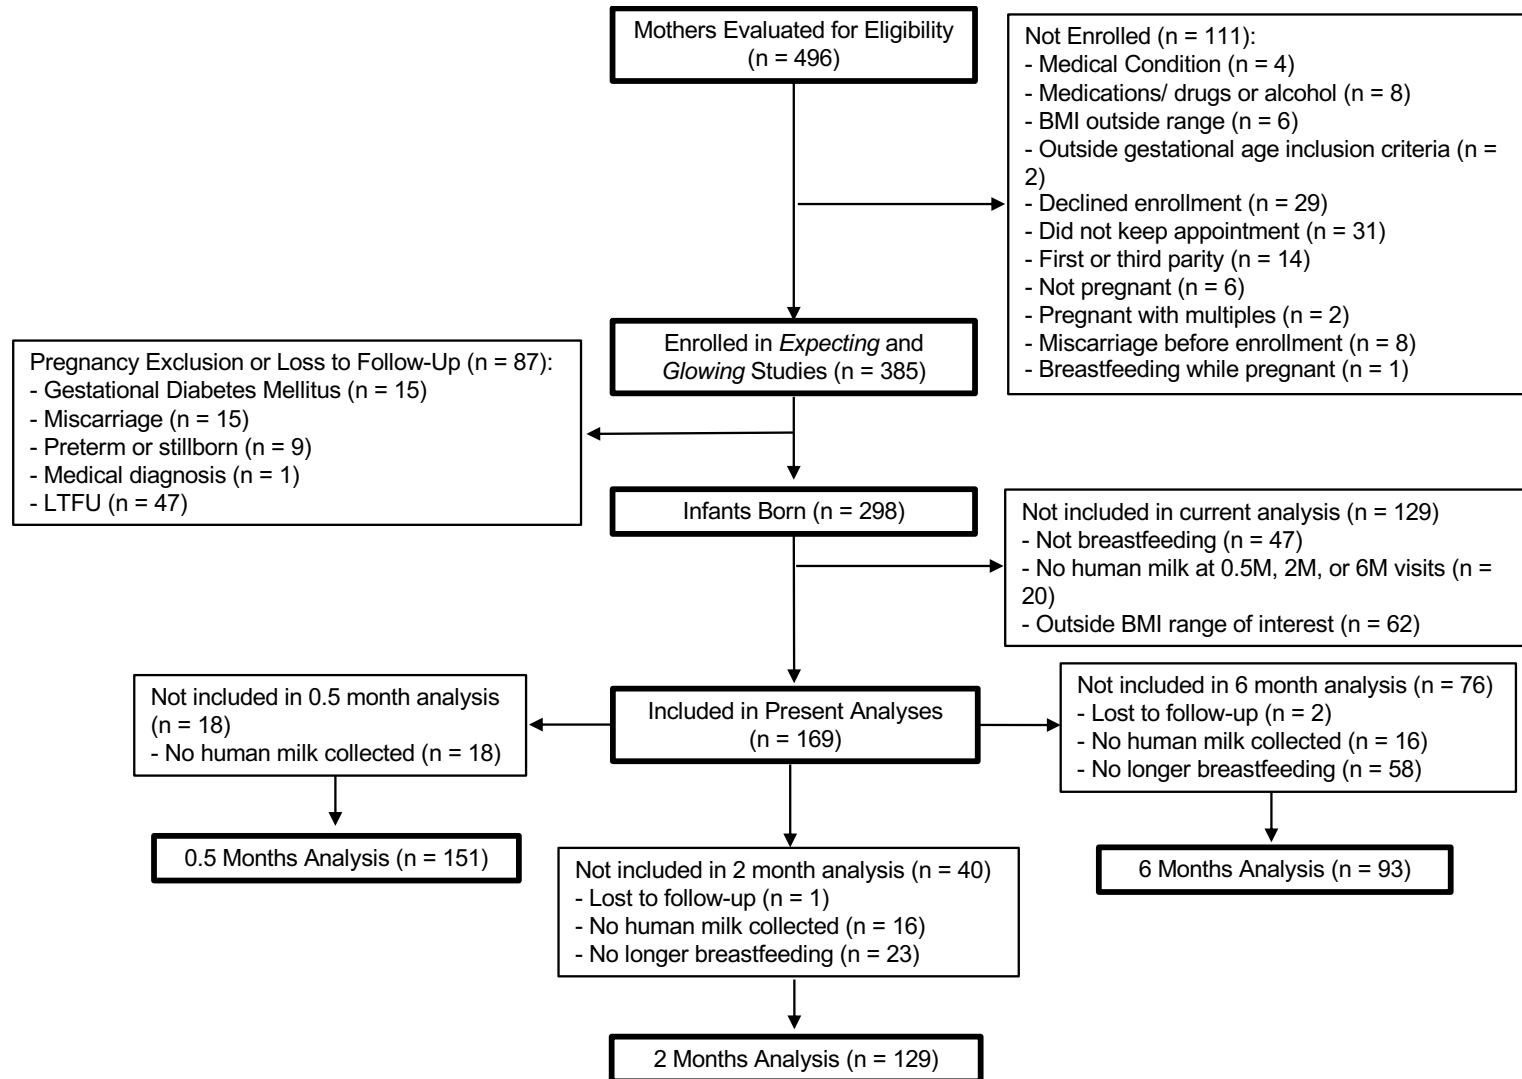

**Supplemental Figure 1. Cohort flow diagram.** Breastfeeding participants (169 mother-child pairs) enrolled in two longitudinal studies ([www.clinicaltrials.gov](http://www.clinicaltrials.gov), ID# NCT01131117 (*Glowing*) and ID# NCT02125149 (*Expecting*)) were included in the study.
