# Supplementary material
Source: PubMed Central journal article supplement (PMC9269030)
Supplement: NIHMS1763146-supplement-supinfo.pdf [file NIHMS1763146-supplement-supinfo.pdf]

Infant Intakes of Human Milk Branched Chain Amino Acids are Negatively Associated with Infant Growth and Influenced by Maternal Body Mass Index  
 Jessica L. Saben, Clark R. Sims, Lindsay Pack, Renny Lan, Elisabet Borsheim, Aline Andres  
 Address: 15 Children's Way, Slot 512-20B  
 Little Rock, AR 72202  
 Email : andresaline@uams.edu  
 Phone: 501-364-3301

**Supplemental Table 1. Multiple Reaction Monitoring Parameters**

| Compound | Q1 Mass | Q3 Mass | Dwell (msec) | DP (V) | EP (V) | CE (V) | CXP (V) |
|----------|---------|---------|--------------|--------|--------|--------|---------|
| ALA      | 218.3   | 130.1   | 100          | 16     | 10     | 17     | 8       |
| ARG      | 303.4   | 69.9    | 100          | 41     | 10     | 51     | 14      |
| ASN      | 243.3   | 157.2   | 100          | 31     | 10     | 15     | 10      |
| ASP      | 304.3   | 216.2   | 100          | 16     | 10     | 19     | 14      |
| C-C      | 497.2   | 248.2   | 100          | 46     | 10     | 25     | 16      |
| CYS      | 336     | 190     | 100          | 36     | 10     | 17     | 10      |
| GLN      | 275.3   | 172.1   | 100          | 26     | 10     | 21     | 10      |
| GLU      | 318.3   | 172.1   | 100          | 26     | 10     | 21     | 10      |
| GLY      | 204.1   | 144     | 100          | 21     | 10     | 13     | 8       |
| HIS      | 370.2   | 196.3   | 100          | 36     | 10     | 33     | 12      |
| IS-d3MET | 281.1   | 193.2   | 100          | 21     | 10     | 17     | 12      |
| IS-HARG  | 317.3   | 84.1    | 100          | 41     | 10     | 53     | 4       |
| IS-HPHE  | 308.3   | 220.2   | 100          | 36     | 10     | 15     | 14      |
| LEU, ILE | 260.3   | 172.1   | 100          | 26     | 10     | 17     | 10      |
| LYS      | 361.2   | 301.3   | 100          | 36     | 10     | 17     | 8       |
| MET      | 278.3   | 190.1   | 100          | 21     | 10     | 17     | 12      |
| PHE      | 294.3   | 206.1   | 100          | 26     | 10     | 17     | 14      |
| PRO      | 244.3   | 156.2   | 100          | 26     | 10     | 19     | 10      |
| Se-C     | 593     | 296     | 100          | 46     | 10     | 23     | 16      |
| SER      | 234.3   | 146     | 100          | 26     | 10     | 17     | 10      |
| THR      | 248.3   | 160.2   | 100          | 36     | 10     | 17     | 10      |
| TRP      | 333.3   | 245.1   | 100          | 36     | 10     | 21     | 10      |
| TYR      | 396.2   | 136.2   | 100          | 46     | 10     | 43     | 8       |
| VAL      | 246.3   | 158.1   | 100          | 21     | 10     | 17     | 10      |

*DP = declustering potential, EP = entrance potential, CE = collision energy, and CXP = cell exit potential*  
 ARG = arginine, ALA = alanine, ASN = asparagine, ASP = aspartic acid, CYS = cysteine, U-C = cystine, U-LU = glutamic acid, GLN = glutamine, GLY = glycine, HIS = histidine, IS-HARG = homocysteine, IS-HPHE = homophenylalanine, ILE = isoleucine, LEU = leucine, LYS = lysine, MET = methionine, IS-d3MET = methionine-d3, PHE = phenylalanine, PRO = proline, Se-C = selenocysteine, SER = serine, THR = threonine, TRP = tryptophan, TYR = tyrosine, VAL = valine

Infant Intakes of Human Milk Branched Chain Amino Acids are Negatively Associated with Infant Growth and Influenced by Maternal Body Mass Index  
Jessica L. Saben, Clark R. Sims, Lindsay Pack, Renny Lan, Elisabet Børsheim, Aline Andres  
Address: 15 Children's Way, Slot 512-20B  
Little Rock, AR 72202  
Email: andresaline@uams.edu  
Phone: 501-364-3301

**Supplemental Table 2. Analyte Coefficient of Variance (CV)**

| <b>Compound</b> | <b>CV</b>      |
|-----------------|----------------|
| ALA             | 16.43          |
| ARG             | 40.39          |
| ASN             | 27.365         |
| ASP             | 19.02          |
| C-C             | 20.955         |
| CYS             | 58.45          |
| GLN             | 21.32          |
| GLU             | 13.07          |
| GLY             | 26.555         |
| HIS             | 36.29          |
| ILE             | 14.7           |
| LEU             | 11.905         |
| LYS             | 22.835         |
| MET             | 46.57          |
| PHE             | 16.225         |
| PRO             | 15.52          |
| Se-C            | Not detectable |
| SER             | 9.42           |
| THR             | 42.025         |
| TRP             | 24.295         |
| TYR             | 20.685         |
| VAL             | 17.08          |

ARG = arginine, ALA = alanine, ASN = asparagine, ASP = aspartic acid, CYS = cysteine, C-C = cystine, GLU = glutamic acid, GLN = glutamine, GLY = glycine, HIS = histidine, ILE = isoleucine, LEU = leucine, LYS = lysine, MET = methionine, PHE = phenylalanine, PRO = proline, Se-C = selenocysteine, SER = serine, THR = threonine, TRP = tryptophan, TRY = tyrosine, VAL = valine

Infant Intakes of Human Milk Branched Chain Amino Acids are Negatively Associated with Infant Growth and Influenced by Maternal Body Mass Index

Jessica L. Saben, Clark R. Sims, Lindsay Pack, Renny Lan, Elisabet Borstein, Aline Andres

Address: 15 Children's Way, Slot 512-20B

Little Rock, AR 72202

Email: andresaline@uams.edu

Phone: 501-364-3301

**Supplemental Table 3. Infant Body Composition Over the First 6 Months of Life**

| Mean ± SE                      | 0.5 Month     |               |                  | 2 Month       |               |          | 6 Month       |               |              |
|--------------------------------|---------------|---------------|------------------|---------------|---------------|----------|---------------|---------------|--------------|
|                                | NW            | OB            | P Value*         | NW            | OB            | P Value* | NW            | OB            | P Value*     |
| <b>WAZ</b>                     | -0.034 ± 0.11 | 0.055 ± 0.09  | 0.534            | -0.087 ± 0.11 | -0.360 ± 0.13 | 0.121    | -0.196 ± 0.12 | -0.017 ± 0.17 | 0.383        |
| <b>WLZ</b>                     | -0.003 ± 0.09 | 0.240 ± 0.11  | 0.101            | 0.466 ± 0.10  | 0.186 ± 0.11  | 0.07     | 0.123 ± 0.14  | 0.434 ± 0.15  | 0.129        |
| <b>FM (kg)</b>                 | 0.482 ± 0.02  | 0.562 ± 0.02  | <b>0.001</b>     | 1.085 ± 0.03  | 1.075 ± 0.04  | 0.857    | 2.220 ± 0.08  | 2.367 ± 0.10  | 0.263        |
| <b>FMI (kg/m<sup>2</sup>)</b>  | 1.793 ± 0.05  | 2.112 ± 0.06  | <b>&lt;0.001</b> | 3.327 ± 0.10  | 3.315 ± 0.10  | 0.928    | 5.092 ± 0.18  | 5.502 ± 0.22  | 0.151        |
| <b>FFM (kg)</b>                | 2.688 ± 0.04  | 2.760 ± 0.03  | 0.189            | 3.550 ± 0.06  | 3.566 ± 0.06  | 0.848    | 4.536 ± 0.07  | 5.749 ± 0.09  | 0.064        |
| <b>FFMI (kg/m<sup>2</sup>)</b> | 10.089 ± 0.10 | 10.405 ± 0.09 | <b>0.023</b>     | 10.919 ± 0.11 | 11.051 ± 0.11 | 0.396    | 10.418 ± 0.13 | 11.048 ± 0.13 | <b>0.001</b> |

\*T-tests were used to test significant differences between groups. NW = normal weight, OB = obese, WAZ = weight-for-age z-score,

WLZ = weight-for-length z-score, FM = fat mass, FMI = fat mass index, FFM = fat free mass, FFMI = fat free mass index

Infant Intakes of Human Milk Branched Chain Amino Acids are Negatively Associated with Infant Growth and Influenced by Maternal Body Mass Index

Jessica L. Saben, Clark R. Sims, Lindsay Pack, Renny Lan, Elisabet Borstein, Aline Andres

Address: 15 Children's Way, Slot 512-20B

Little Rock, AR 72202

Email: andresaline@uams.edu

Phone: 501-364-3301

**Supplemental Table 4. Infant Feeding Patterns Over the First 6 Months of Life**

|                                                                | 0.5M            |                 | 2M             |                | 6M             |                |
|----------------------------------------------------------------|-----------------|-----------------|----------------|----------------|----------------|----------------|
|                                                                | NW (N = 56)     | OB (N = 46)     | NW (N = 54)    | OB (N = 46)    | NW (N = 51)    | OB (N = 29)    |
| <b>Total Intake (mL/kg/day), median (IQR)<sup>1</sup></b>      | 179.6           | 163.6           | 114            | 135            | 76.8           | 60.4           |
|                                                                | (129.2 - 226.8) | (113.0 - 211.2) | (84.0 - 155.9) | (86.7 - 169.8) | (53.2 - 127.4) | (44.0 - 106.7) |
|                                                                |                 | 0.842           |                | 0.312          |                | 0.341          |
| <b>Human Milk Intake (mL/kg/day), median (IQR)<sup>1</sup></b> | 179.6           | 152.6           | 114            | 128.1          | 76.8           | 60.4           |
|                                                                | (129.2 - 226.8) | (93.6 - 211.2)  | (85.4 - 155.9) | (76.5 - 168.4) | (53.2 - 127.4) | (44.0 - 106.7) |
|                                                                |                 | 0.551           |                | 0.544          |                | 0.341          |
| <b>Infant Feeding Status<sup>2</sup></b>                       |                 |                 |                |                |                |                |
|                                                                |                 | 0.005           |                | 0.048          |                | 0.274          |
| <b>Supplemented with Formula, N (%)</b>                        | 2 (3.6%)        | 10 (21.7%)      | 2 (3.7%)       | 7 (15.2%)      | 1 (2.0%)       | 2 (7.4%)       |
| <b>Not Supplemented with Formula, N (%)</b>                    | 54 (96.4%)      | 36 (78.3%)      | 52 (96.3%)     | 39 (84.8%)     | 50 (98.0)      | 25 (92.6%)     |

<sup>1</sup> Mann-Whitney U non-parametric tests were used to determine significant difference between groups

<sup>2</sup> Chi-Square tests were used to determine significant difference between groups

NW = normal weight, OB = obese
